# Supplementary material for: Социально-экономические аспекты репродуктивного поведения (по данным литературы)
Source: Royal Society of Chemistry journal article supplement (doi:10.1039/d2bm01211a), 2014-01-01
Supplement: d2bm01211a1.pdf [file d2bm01211a1.pdf]

## Supporting Information

### **Cationic polymer synergizing with the disulfide-containing enhancer achieved efficient nucleic acid and protein delivery**

Yuanji Feng<sup>1,2</sup>, Zhaopei Guo<sup>1</sup>, Jie Chen<sup>1</sup>, Sijia Zhang<sup>1,2</sup>, Jiayan Wu<sup>1,2</sup>, Huayu Tian<sup>1,2,3,4\*</sup>, and Xuesi Chen<sup>1,2,4</sup>

<sup>1</sup>Key Laboratory of Polymer Ecomaterials, Changchun Institute of Applied Chemistry, Chinese Academy of Sciences, Changchun 130022, China.

<sup>2</sup>University of Science and Technology of China, Hefei 230026, China.

<sup>3</sup>College of Chemistry and Chemical Engineering, Xiamen University, Xiamen 361005, China.

<sup>4</sup>Jilin Biomedical Polymers Engineering Laboratory, Changchun 130022, China.

\*Corresponding author, Email: [thy@xmu.edu.cn](mailto:thy@xmu.edu.cn)

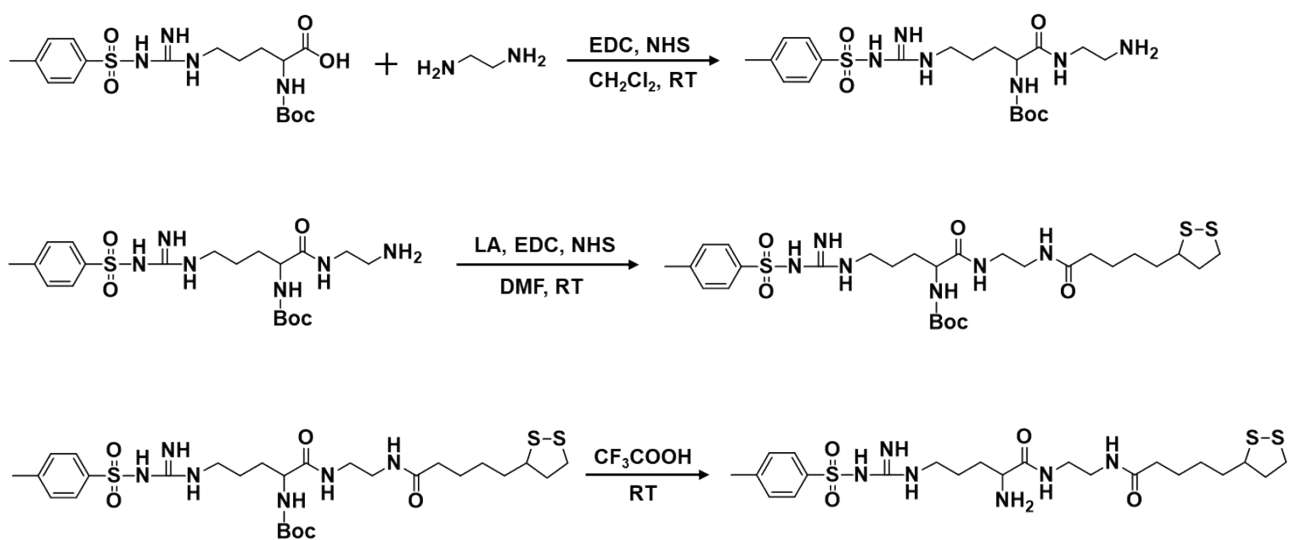

Fig. S1 Synthesis pathway of LA-RT.

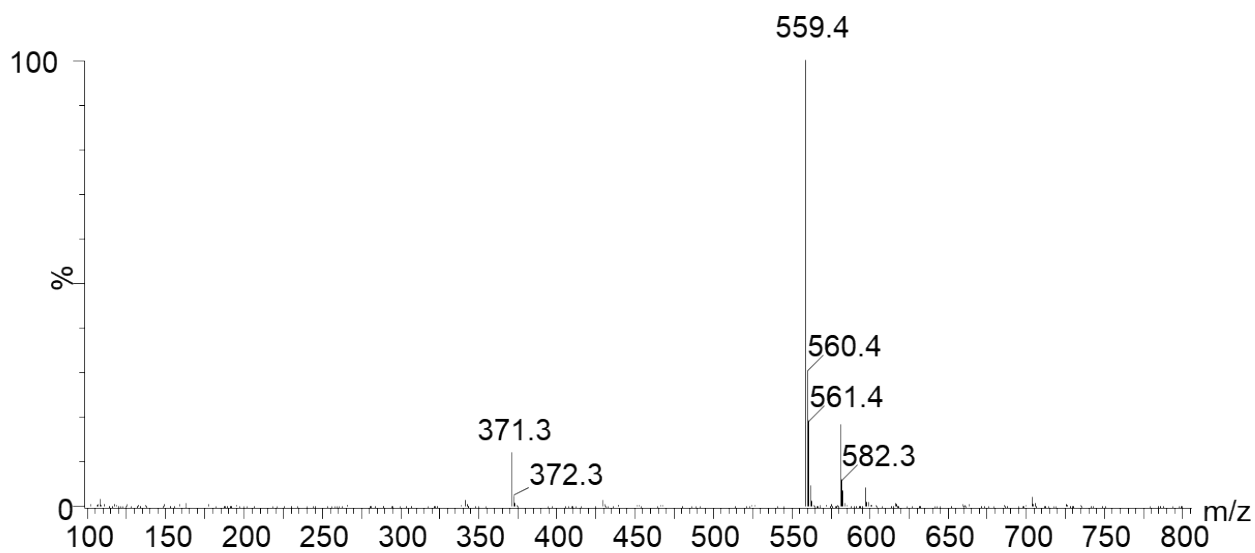

Fig. S2 ESI-MS of LA-RT.

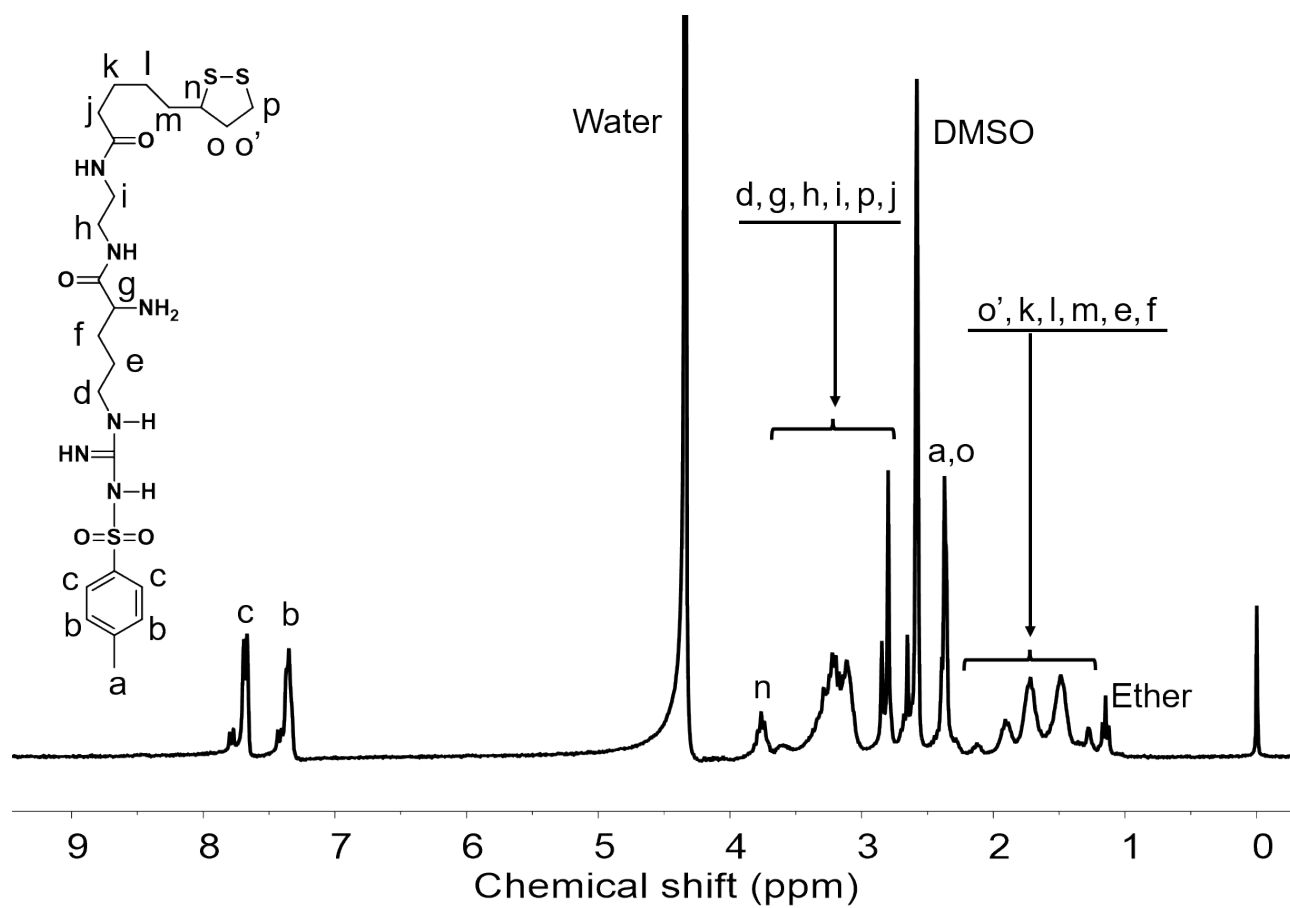

Fig. S3  $^1\text{H}$  NMR of LA-RT (300 MHz,  $\text{D}_2\text{O}/\text{DMSO-d}_6$  (v/v) = 1/1)

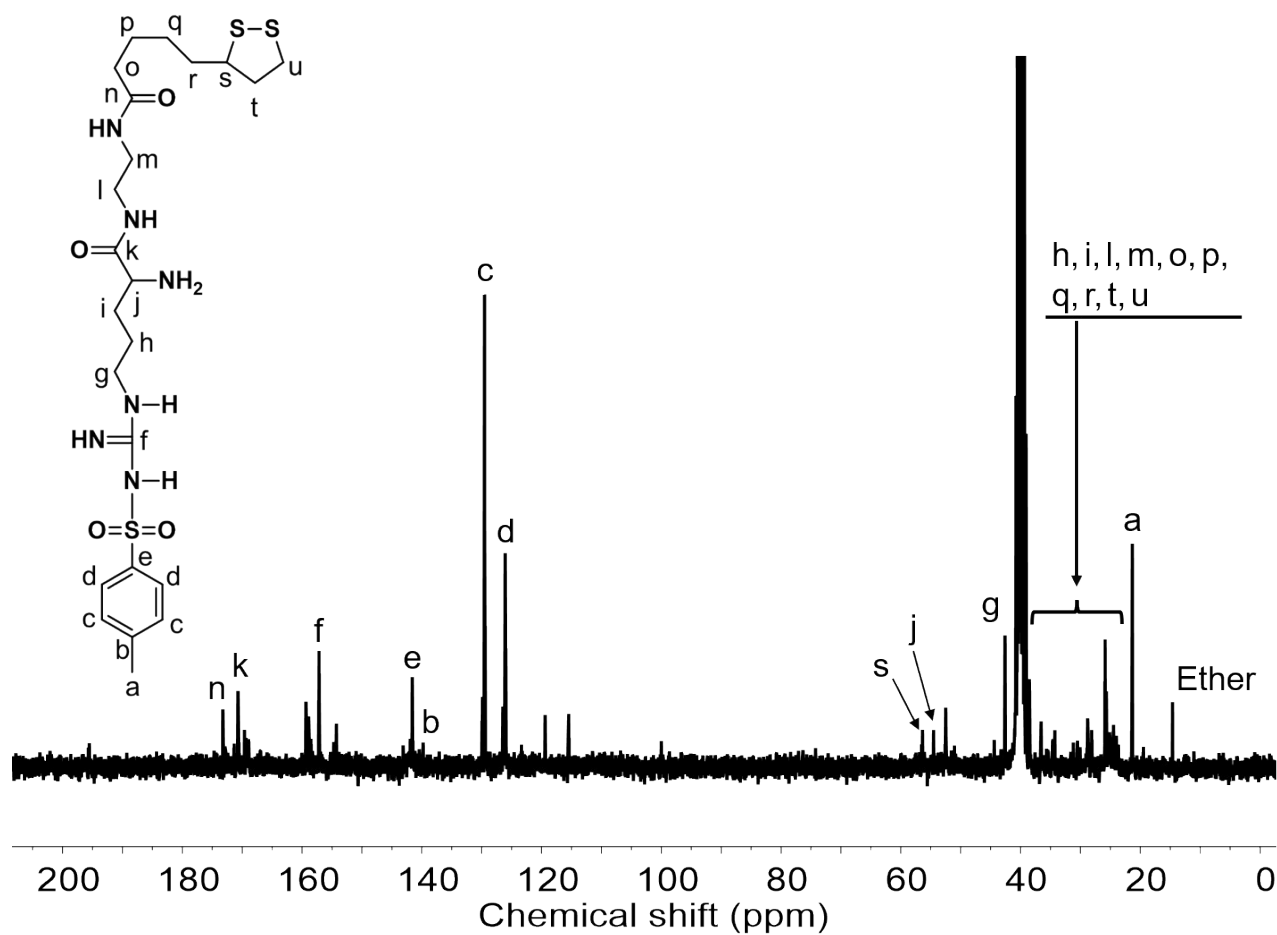

Fig. S4 <sup>13</sup>C NMR of LA-RT (300 MHz, DMSO-d<sub>6</sub>)

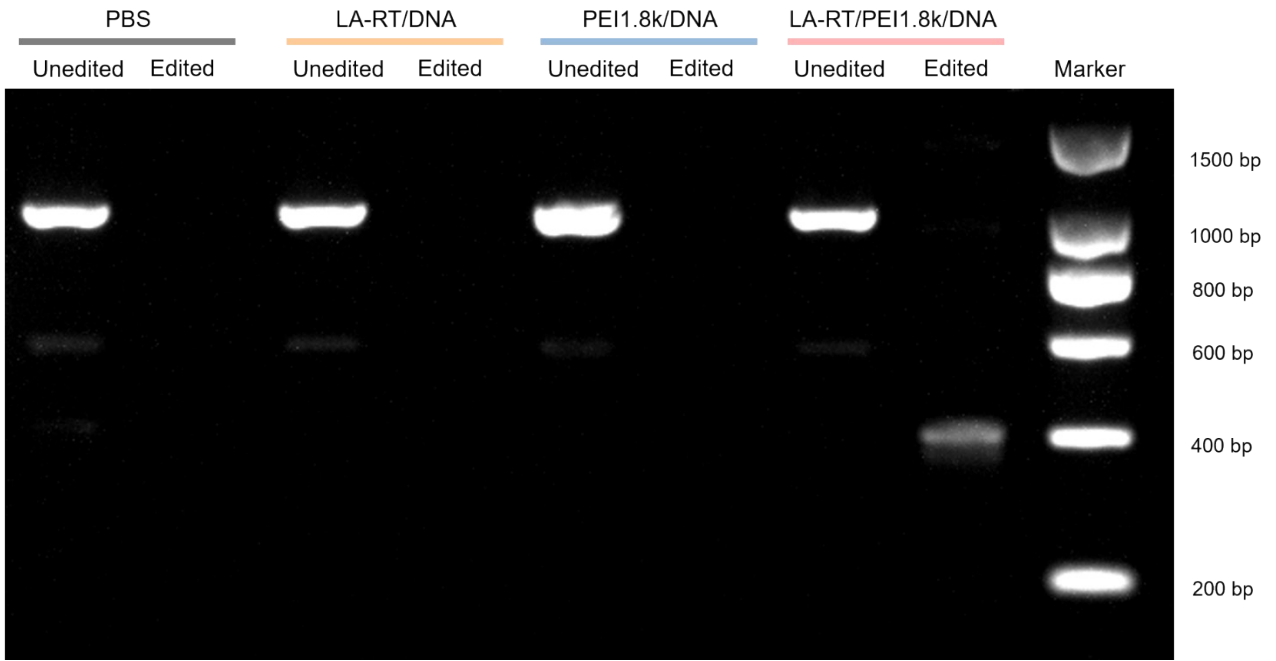

Fig. S5 The DNA gel electrophoresis photo of PD-L1 genes.

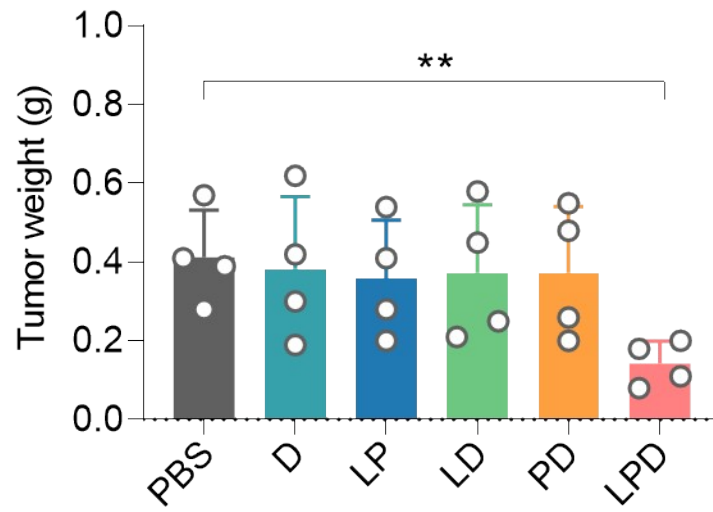

Fig. S6 The weight of tumor tissues from different treatment groups.

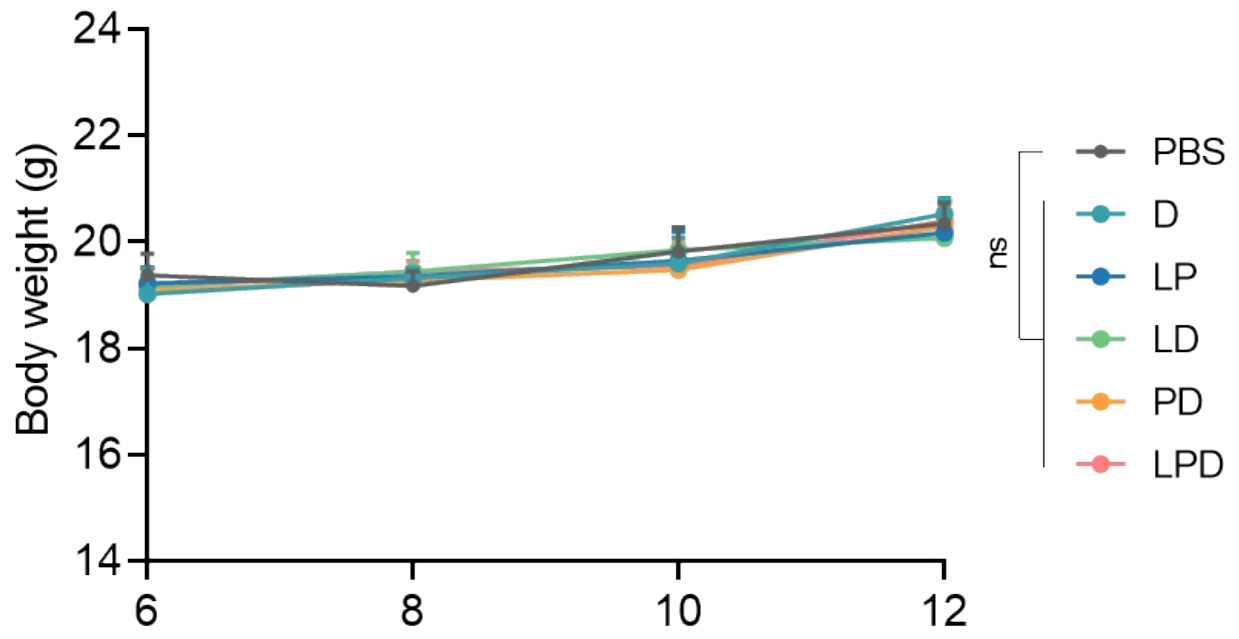

Fig. S7 The body weight of mice during the treatment.



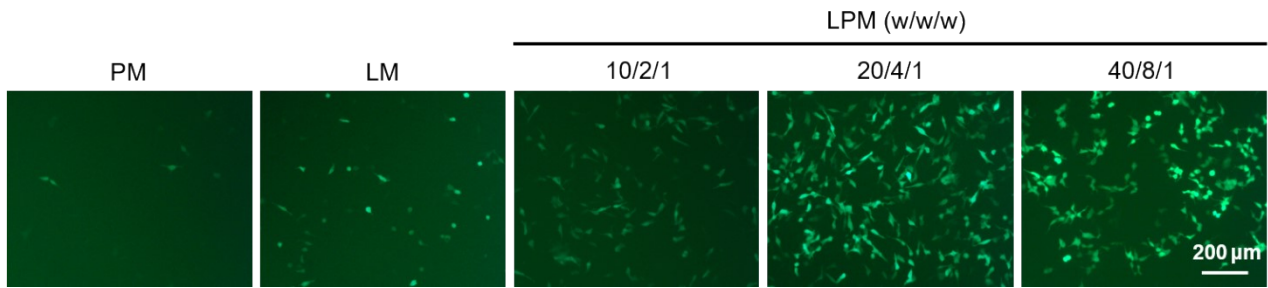

Fig. S8 The EGFP mRNA transfection of PEI1.8k/mRNA, LA-RT/mRNA, and LA-RT/PEI1.8k/mRNA with different mass ratio in B16F10 cells.

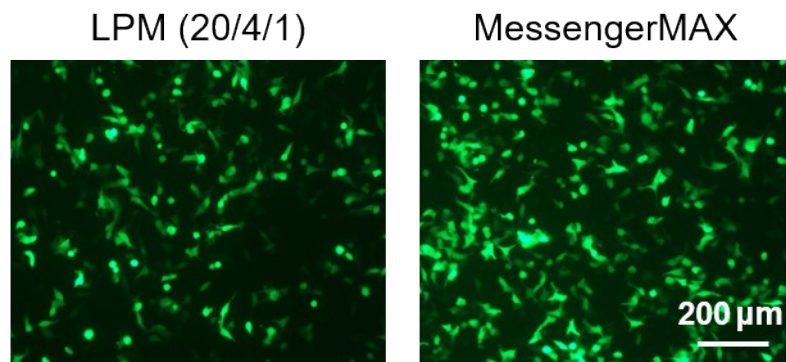

Fig. S9 The EGFP mRNA transfection of LA-RT/PEI1.8k/mRNA and MessengerMAX in B16F10 cells.

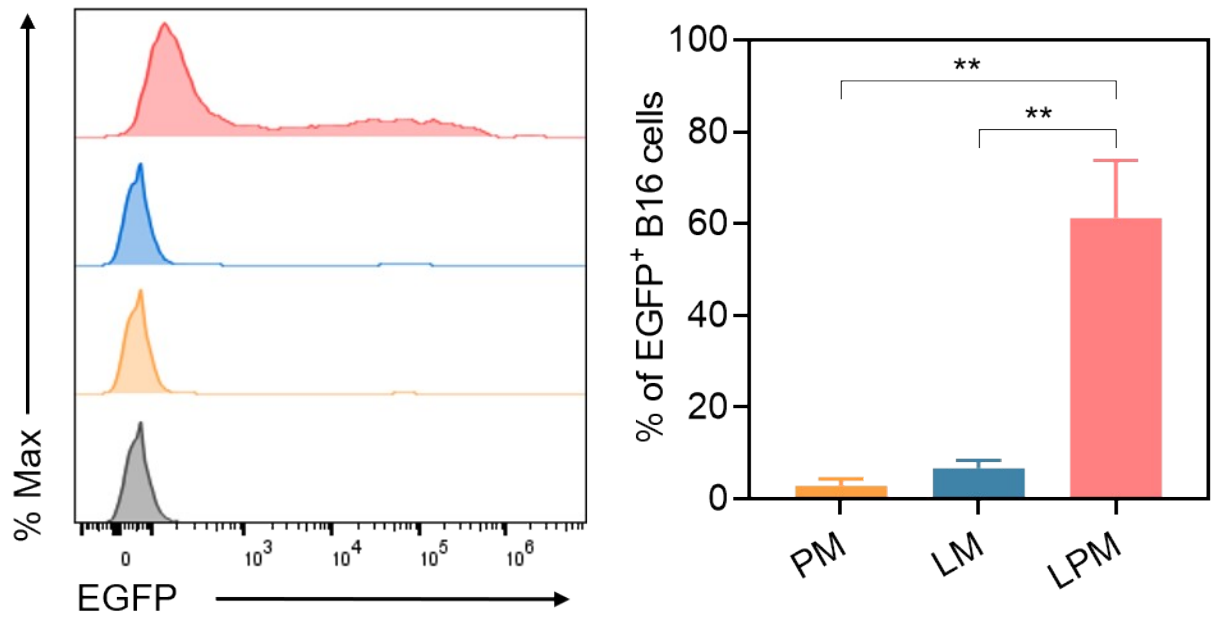

Fig. S10 The EGFP mRNA expression in B16F10 of PEI1.8k/mRNA, LA-RT/mRNA, and LA-RT/PEI1.8k/mRNA characterized by flow cytometry.

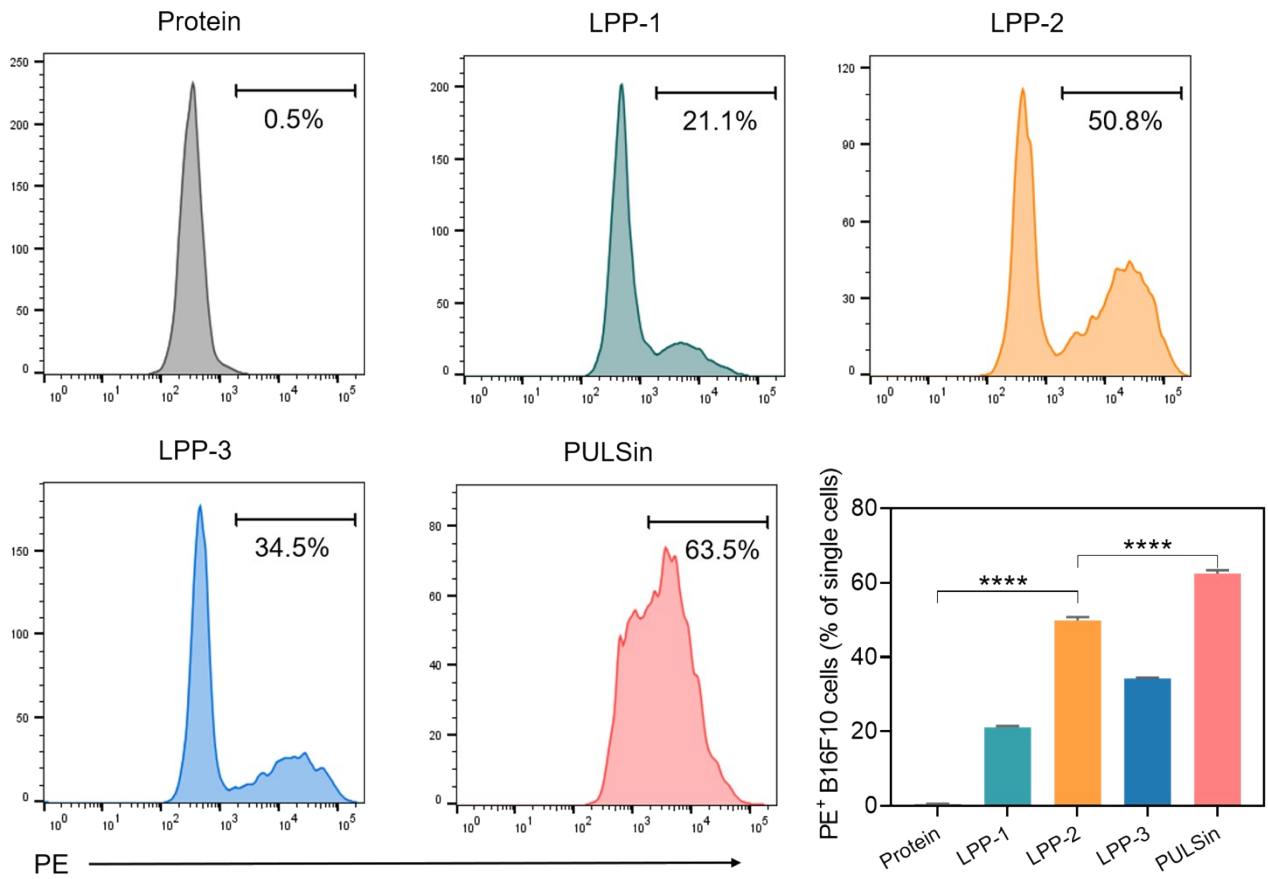

Fig. S11 The protein transfection of LA-RT/PEI1.8k/protein (LPP) with different mass ratio and PULSin. The mass ratio of LA-RT/PEI1.8k/protein was 5/1/1 for LPP-1, 10/2/1 for LPP-2 and 20/4/1 for LPP-3.

**Table S1.** Plasmid DNA sequence for SgRNA transcription.

| <b>SgRNA</b>  | <b>DNA sequence in plasmid</b>                                                                     |
|---------------|----------------------------------------------------------------------------------------------------|
| SgRNA-EGFP    | gtgaaccgcatcgagctgaagtttagagctagaaatagcaagttaaataaggct<br>agtccggtatcaactgaaaaagtggcaccgagtcggtgc  |
| SgRNA-PD-L1-1 | aatcaaccagagaatttccggttttagagctagaaatagcaagttaaataaggcta<br>gtccggtatcaactgaaaaagtggcaccgagtcggtgc |
| SgRNA-PD-L1-2 | gtatggcagcaacgtcacgagtttagagctagaaatagcaagttaaataaggct<br>agtccggtatcaactgaaaaagtggcaccgagtcggtgc  |

**Table S2.** Primers for RT-PCR.

| <b>Gene</b>           | <b>Primers</b> |                            |
|-----------------------|----------------|----------------------------|
| <i>Unedited PD-L1</i> | Forward        | GGA GCG CAC GGC TTC TCC AC |
|                       | Reverse        | AGA GCT GGG GGA TCG GGT GC |
| <i>Edited PD-L1</i>   | Forward        | CAC CCC CGC CCC ATG AAG TT |
|                       | Reverse        | TTC GCT GTG GCG TTG ACC CT |

**Table S3.** Antibodies for flow cytometry.

| <b>Antibodies</b>                 | <b>Company</b> | <b>Catalog No.</b> |
|-----------------------------------|----------------|--------------------|
| Anti-CD3                          | Biolegend      | 100306             |
| Anti-CD4                          | Biolegend      | 116016             |
| Anti-CD8                          | Biolegend      | 100712             |
| Anti-CD80                         | Biolegend      | 104714             |
| Anti-CD86                         | Biolegend      | 105030             |
| Anti-OVA257-264/H-2K <sup>b</sup> | Ebioscience    | 12-5743-82         |
| Anti-PD-L1                        | Biolegend      | 124313             |
